# Supplementary material for: Xenopus borealis as an alternative source of oocytes for biophysical and pharmacological studies of neuronal ion channels
Source: PubMed Central journal article supplement (PMC4594035; doi:10.1038/srep14763), 2015-10-06
Supplement: srep14763-s1.pdf [file srep14763-s1.pdf]

Supplementary Information

***Xenopus borealis* as an alternative source of oocytes for biophysical  
and pharmacological studies of neuronal ion channels**

**Ben Cristofori-Armstrong, Ming S. Soh, Sahil Talwar, Darren L. Brown, John D. O.  
Griffin, Zoltan Dekan, Jennifer L. Stow, Glenn F. King, Joseph W. Lynch & Lachlan D.  
Rash**

### Supplementary Table S1

Comparison of mean values for fast and slow time constants ( $\tau$ ) of deactivation for  $K_V10.1$  channels tested in *X. laevis* and *X. borealis* oocytes. There is no evidence of a difference between the two species for all measured parameters (unpaired t-test,  $P > 0.05$ ).

| Ion Channel    | Tau – deactivation (ms) |                    | P value | Reference |
|----------------|-------------------------|--------------------|---------|-----------|
|                | <i>X. laevis</i>        | <i>X. borealis</i> |         |           |
| $K_V10.1$      |                         |                    |         |           |
| Slow (–120 mV) | 145.9                   | 169.7              | 0.075   |           |
| Slow (–110 mV) | 147.6                   | 169.8              | 0.085   | 1         |
| Slow (–100 mV) | 174.4                   | 193.7              | 0.257   |           |
| Slow (–90 mV)  | 180.0                   | 198.9              | 0.187   |           |
| Fast (–120 mV) | 25.6                    | 27.1               | 0.725   |           |
| Fast (–110 mV) | 21.9                    | 25.2               | 0.406   | 1         |
| Fast (–100 mV) | 22.4                    | 27.3               | 0.289   |           |
| Fast (–90 mV)  | 20.5                    | 23.9               | 0.319   |           |

### Supplementary Table S2

Properties of MTS-TAMRA labelled  $\alpha_1N203C$  and MTSR labelled  $\alpha_1R271C$  human GlyRs. Comparison of  $EC_{50}$ , slope, maximal current change ( $\Delta I_{max}$ ), and maximal fluorescence change ( $\Delta F_{max}$ ) values tested in *X. laevis* and *X. borealis* oocytes. Data are mean  $\pm$  s.e.m. There is no evidence of a difference between the two species for all measured parameters (unpaired t-test,  $P > 0.05$ ). Data are comparable to literature values for  $\alpha_1N203C$ <sup>2</sup> and  $\alpha_1R271C$ <sup>3</sup>.

| Ion Channel              | $EC_{50}$ ( $\mu M$ )                                |                    | P value |
|--------------------------|------------------------------------------------------|--------------------|---------|
|                          | <i>X. laevis</i>                                     | <i>X. borealis</i> |         |
| GlyR                     |                                                      |                    |         |
| $\alpha_1N203C \Delta I$ | 145 $\pm$ 10                                         | 136 $\pm$ 8.7      | 0.69    |
| $\alpha_1N203C \Delta F$ | 548 $\pm$ 25                                         | 408 $\pm$ 51       | 0.63    |
| $\alpha_1R271C \Delta I$ | 1926 $\pm$ 175                                       | 1698 $\pm$ 104     | 0.52    |
| $\alpha_1R271C \Delta F$ | 872 $\pm$ 58                                         | 1006 $\pm$ 98      | 0.46    |
|                          | Slope                                                |                    | P value |
|                          | <i>X. laevis</i>                                     | <i>X. borealis</i> |         |
| $\alpha_1N203C \Delta I$ | 1.9 $\pm$ 0.2                                        | 1.5 $\pm$ 0.1      | 0.82    |
| $\alpha_1N203C \Delta F$ | 1.4 $\pm$ 0.2                                        | 1.8 $\pm$ 0.1      | 0.62    |
| $\alpha_1R271C \Delta I$ | 1.4 $\pm$ 0.2                                        | 2.0 $\pm$ 0.2      | 0.1     |
| $\alpha_1R271C \Delta F$ | 1.3 $\pm$ 0.2                                        | 1.0 $\pm$ 0.1      | 0.46    |
|                          | $\Delta I_{max}$ ( $\mu A$ ) or $\Delta F_{max}$ (%) |                    | P value |
|                          | <i>X. laevis</i>                                     | <i>X. borealis</i> |         |
| $\alpha_1N203C \Delta I$ | 8.4 $\pm$ 0.2                                        | 8.0 $\pm$ 0.8      | 0.63    |
| $\alpha_1N203C \Delta F$ | 25.9 $\pm$ 4.2                                       | 27.8 $\pm$ 4.4     | 0.77    |
| $\alpha_1R271C \Delta I$ | 3.4 $\pm$ 1.7                                        | 2.7 $\pm$ 0.5      | 0.69    |
| $\alpha_1R271C \Delta F$ | 12.2 $\pm$ 2.2                                       | 9.0 $\pm$ 2.2      | 0.34    |

### Supplementary Table S3

Comparison of half-maximal response and slope values for ion channels tested in *X. laevis* and *X. borealis* oocytes and references to studies reporting similar values for these parameters. Steady-state desensitisation: SSD; Activation: act. There is no evidence of a difference between the two species for any of the measured parameters (unpaired t-test,  $P > 0.05$ ).

| Ion Channel                      | Half-maximal response                                     |                    | <i>P</i> value | Slope            |                    | <i>P</i> value | Reference |
|----------------------------------|-----------------------------------------------------------|--------------------|----------------|------------------|--------------------|----------------|-----------|
|                                  | <i>X. laevis</i>                                          | <i>X. borealis</i> |                | <i>X. laevis</i> | <i>X. borealis</i> |                |           |
| Voltage-gated potassium channels |                                                           |                    |                |                  |                    |                |           |
| K <sub>V</sub> 10.1              | 19.7 mV                                                   | 20.2 mV            | 0.86           | 20.8             | 20.6               | 0.90           | 1         |
| K <sub>V</sub> 11.1              | -24.3 mV                                                  | -23.7 mV           | 0.18           | 6.98             | 7.53               | 0.16           | 4         |
| Voltage-gated sodium channels    |                                                           |                    |                |                  |                    |                |           |
| Na <sub>V</sub> 1.2              | -22.5 mV                                                  | -22.3 mV           | 0.61           | 4.74             | 4.60               | 0.84           | 5         |
| Na <sub>V</sub> 1.5              | -33.5 mV                                                  | -33.8 mV           | 0.49           | 4.81             | 4.22               | 0.08           | 6         |
| Na <sub>V</sub> 1.7              | -14.2 mV                                                  | -14.8 mV           | 0.09           | 5.24             | 4.88               | 0.27           | 7         |
| Acid-sensing ion channels        |                                                           |                    |                |                  |                    |                |           |
| ASIC1a pH <sub>act</sub>         | pH 6.11                                                   | pH 6.06            | 0.27           | 1.95             | 1.86               | 0.83           | 8         |
| ASIC1a pH <sub>SSD</sub>         | pH 7.19                                                   | pH 7.19            | 0.66           | 10.39            | 9.97               | 0.69           | 8         |
| ASIC1b pH <sub>act</sub>         | pH 5.95                                                   | pH 5.97            | 0.11           | 3.98             | 3.36               | 0.12           | 9         |
| ASIC1b pH <sub>SSD</sub>         | pH 6.78                                                   | pH 6.78            | 0.72           | 4.17             | 4.09               | 0.91           | 10        |
| ASIC2a pH <sub>act</sub>         | Ambiguous fits with sigmoidal non-linear regression model |                    |                |                  |                    |                |           |
| ASIC2a pH <sub>SSD</sub>         | pH 5.99                                                   | pH 5.98            | 0.66           | 2.27             | 2.37               | 0.78           | 11        |
| ASIC3 pH <sub>act</sub>          | pH 6.16                                                   | pH 6.12            | 0.13           | 1.46             | 1.60               | 0.40           | 9         |
| ASIC3 pH <sub>SSD</sub>          | pH 7.04                                                   | pH 7.02            | 0.19           | 8.25             | 9.04               | 0.70           | 12        |
| Pc1a:ASIC1a                      | 1.00 nM                                                   | 1.03 nM            | 0.63           | 1.44             | 1.60               | 0.34           | 13        |
| APETx2:ASIC3                     | 64.7 nM                                                   | 51.1 nM            | 0.05           | 0.84             | 0.93               | 0.37           | 14        |
| GABA <sub>A</sub> receptors      |                                                           |                    |                |                  |                    |                |           |
| $\alpha_1\beta_2\gamma_{2L}$     | 25.1 $\mu$ M                                              | 17.9 $\mu$ M       | 0.27           | 0.56             | 0.60               | 0.71           | 15        |
| $\alpha_5\beta_2\gamma_{2L}$     | 5.18 $\mu$ M                                              | 4.71 $\mu$ M       | 0.84           | 0.49             | 0.74               | 0.16           | 16        |
| $\alpha_5\beta_3\gamma_{2L}$     | 3.10 $\mu$ M                                              | 3.92 $\mu$ M       | 0.35           | 0.75             | 0.93               | 0.27           | 17        |

## Supplementary Figure S1

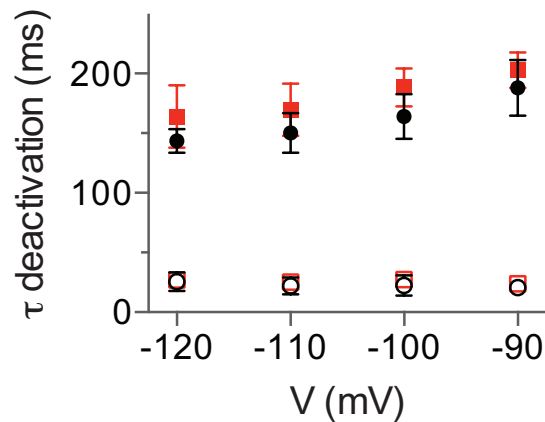

**Figure. S1. Deactivation kinetics of Kv10.1 channels expressed in *X. laevis* (●) and *X. borealis* (■) oocytes.** Fast (open symbols) and slow (closed symbols) time constants ( $\tau$ ) of deactivation (analysed from the tail current at different voltages following a maximally activating pre-pulse to +80 mV) ( $n = 12-15$ ). Error bars indicate 95% confidence intervals.

### Supplementary References

- 1 Simons, C. *et al.* Mutations in the voltage-gated potassium channel gene *KCNH1* cause Temple-Baraitser syndrome and epilepsy. *Nat. Genet.* **47**, 73-77, doi:10.1038/ng.3153 (2015).
- 2 Pless, S. A. & Lynch, J. W. Ligand-specific conformational changes in the  $\alpha 1$  glycine receptor ligand-binding domain. *J. Biol. Chem.* **284**, 15847-15856, doi:10.1074/jbc.M809343200 (2009).
- 3 Pless, S. A., Dibas, M. I., Lester, H. A. & Lynch, J. W. Conformational variability of the glycine receptor M2 domain in response to activation by different agonists. *J. Biol. Chem.* **282**, 36057-36067, doi:10.1074/jbc.M706468200 (2007).
- 4 Twiner, M. J. *et al.* Marine algal toxin azaspiracid is an open-state blocker of hERG potassium channels. *Chem. Res. Toxicol.* **25**, 1975-1984, doi:10.1021/tx300283t (2012).
- 5 Nguyen, H. M. & Goldin, A. L. Sodium channel carboxyl-terminal residue regulates fast inactivation. *J. Biol. Chem.* **285**, 9077-9089, doi:10.1074/jbc.M109.054940 (2010).
- 6 Jones, D. K., Peters, C. H., Tolhurst, S. A., Claydon, T. W. & Ruben, P. C. Extracellular proton modulation of the cardiac voltage-gated sodium channel, Nav1.5. *Biophys. J.* **101**, 2147-2156, doi:10.1016/j.bpj.2011.08.056 (2011).

- 7 Zhang, M. M. *et al.* Co-expression of Nav $\beta$  subunits alters the kinetics of inhibition of voltage-gated sodium channels by pore-blocking  $\mu$ -conotoxins. *Br. J. Pharmacol.* **168**, 1597-1610, doi:10.1111/bph.12051 (2013).
- 8 Schroeder, C. I. *et al.* Chemical synthesis, 3D structure, and ASIC binding site of the toxin mambalgin-2. *Angew. Chem. Int. Ed. Engl.* **53**, 1017-1020, doi:10.1002/anie.201308898 (2014).
- 9 Hesselager, M., Timmermann, D. B. & Ahring, P. K. pH Dependency and desensitization kinetics of heterologously expressed combinations of acid-sensing ion channel subunits. *J. Biol. Chem.* **279**, 11006-11015, doi:10.1074/jbc.M313507200 (2004).
- 10 Chen, X., Kalbacher, H. & Gründer, S. Interaction of acid-sensing ion channel (ASIC) 1 with the tarantula toxin psalmotoxin 1 is state dependent. *J. Gen. Physiol.* **127**, 267-276, doi:10.1085/jgp.200509409 (2006).
- 11 Salinas, M. *et al.* Binding site and inhibitory mechanism of the mambalgin-2 pain-relieving peptide on acid-sensing ion channel 1a. *J. Biol. Chem.* **289**, 13363-13373, doi:10.1074/jbc.M114.561076 (2014).
- 12 Yagi, J., Wenk, H. N., Naves, L. A. & McCleskey, E. W. Sustained currents through ASIC3 ion channels at the modest pH changes that occur during myocardial ischemia. *Circ. Res.* **99**, 501-509, doi:10.1161/01.RES.0000238388.79295.4c (2006).
- 13 Escoubas, P. *et al.* Isolation of a tarantula toxin specific for a class of proton-gated Na<sup>+</sup> channels. *J. Biol. Chem.* **275**, 25116-25121, doi:10.1074/jbc.M003643200 (2000).
- 14 Diochot, S. *et al.* A new sea anemone peptide, APETx2, inhibits ASIC3, a major acid-sensitive channel in sensory neurons. *EMBO J.* **23**, 1516-1525, doi:10.1038/sj.emboj.7600177 (2004).
- 15 Hall, B. J., Chebib, M., Hanrahan, J. R. & Johnston, G. A. 6-Methylflavanone, a more efficacious positive allosteric modulator of gamma-aminobutyric acid (GABA) action at human recombinant  $\alpha_2\beta_2\gamma_{2L}$  than at  $\alpha_1\beta_2\gamma_{2L}$  and  $\alpha_1\beta_2$  GABA<sub>A</sub> receptors expressed in *Xenopus* oocytes. *Eur. J. Pharmacol.* **512**, 97-104, doi:10.1016/j.ejphar.2005.02.034 (2005).
- 16 Karim, N. *et al.* Potency of GABA at human recombinant GABA<sub>A</sub> receptors expressed in *Xenopus* oocytes: a mini review. *Amino acids* **44**, 1139-1149, doi:10.1007/s00726-012-1456-y (2013).
- 17 Ramerstorfer, J., Furtmüller, R., Vogel, E., Huck, S. & Sieghart, W. The point mutation  $\gamma$ 2F77I changes the potency and efficacy of benzodiazepine site ligands in different GABA<sub>A</sub> receptor subtypes. *Eur. J. Pharmacol.* **636**, 18-27, doi:10.1016/j.ejphar.2010.03.015 (2010).
